# Supplementary material for: Two-step three-component process for one-pot synthesis of 8-alkylmercaptocaffeine derivatives
Source: Royal Society of Chemistry journal article supplement (doi:10.1039/c6ra17814f), 2016-01-01

## ((Supporting Information))

# Two-Step Three-Component Process for One-Pot Synthesis of 8-Alkylmercaptocaffeine Derivatives

Mohammad Navid Soltani Rad,\* Saeid Maghsoudi

*Medicinal Chemistry Research Laboratory, Department of Chemistry, Shiraz University of Technology, Shiraz  
71555-313, Iran*

| Table of Contents                                        |      |
|----------------------------------------------------------|------|
| Content                                                  | Page |
| InChI keys for all compounds                             | S2   |
| <sup>1</sup> H-NMR and <sup>13</sup> C-NMR of <b>12a</b> | S3   |
| <sup>1</sup> H-NMR and <sup>13</sup> C-NMR of <b>12b</b> | S4   |
| <sup>1</sup> H-NMR and <sup>13</sup> C-NMR of <b>12c</b> | S5   |
| <sup>1</sup> H-NMR and <sup>13</sup> C-NMR of <b>12d</b> | S6   |
| <sup>1</sup> H-NMR and <sup>13</sup> C-NMR of <b>12e</b> | S7   |
| <sup>1</sup> H-NMR and <sup>13</sup> C-NMR of <b>12f</b> | S8   |
| <sup>1</sup> H-NMR and <sup>13</sup> C-NMR of <b>12g</b> | S9   |
| <sup>1</sup> H-NMR and <sup>13</sup> C-NMR of <b>12h</b> | S10  |
| <sup>1</sup> H-NMR and <sup>13</sup> C-NMR of <b>12i</b> | S11  |
| <sup>1</sup> H-NMR and <sup>13</sup> C-NMR of <b>12j</b> | S12  |
| <sup>1</sup> H-NMR and <sup>13</sup> C-NMR of <b>12k</b> | S13  |
| <sup>1</sup> H-NMR and <sup>13</sup> C-NMR of <b>12l</b> | S14  |
| <sup>1</sup> H-NMR and <sup>13</sup> C-NMR of <b>12m</b> | S15  |
| <sup>1</sup> H-NMR and <sup>13</sup> C-NMR of <b>12n</b> | S16  |
| <sup>1</sup> H-NMR and <sup>13</sup> C-NMR of <b>12o</b> | S17  |
| <sup>1</sup> H-NMR and <sup>13</sup> C-NMR of <b>12p</b> | S18  |
| <sup>1</sup> H-NMR and <sup>13</sup> C-NMR of <b>12q</b> | S19  |

| Comp. No. | Structure                                                                           | InChI (Key)                  |
|-----------|-------------------------------------------------------------------------------------|------------------------------|
| 12a       | 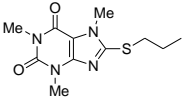   | NQAOTSAYIYBMOK-UHFFFAOYSA-N  |
| 12b       |    | BYAXXWJFKUQAQC-UHFFFAOYSA-N  |
| 12c       |    | YBABVJLTZXASQI-UHFFFAOYSA-N  |
| 12d       |    | OQNGKYGRZLRTPP-UHFFFAOYSA-N  |
| 12e       |    | IOUPUUCUWVXPNT-UHFFFAOYSA-N  |
| 12f       |    | JGRQOZBOSKJTIK-UHFFFAOYSA-N  |
| 12g       |    | BVEBFAGNKHKOOC-UHFFFAOYSA-N  |
| 12h       |   | MGAOAMZOLCYPSTY-UHFFFAOYSA-N |
| 12i       |  | ABJRDQOQRDCGEL-UHFFFAOYSA-N  |
| 12j       |  | LKHBCOZTKMDQEV-UHFFFAOYSA-N  |
| 12k       |  | BZPSFTGQEZGZRX-UHFFFAOYSA-N  |
| 12l       |  | AYQZKQHEXAMKFR-UHFFFAOYSA-N  |
| 12m       |  | KHELBFPPTSZIBC-UHFFFAOYSA-N  |
| 12n       |  | APULFYUWWFSEQF-UHFFFAOYSA-N  |
| 12o       |  | YHNYCCLLQKRBRQ-UHFFFAOYSA-N  |
| 12p       |  | GUCYNRBLBZJDPV-UHFFFAOYSA-N  |
| 12q       |  | PPKAPPCAUIDGQV-UHFFFAOYSA-N  |

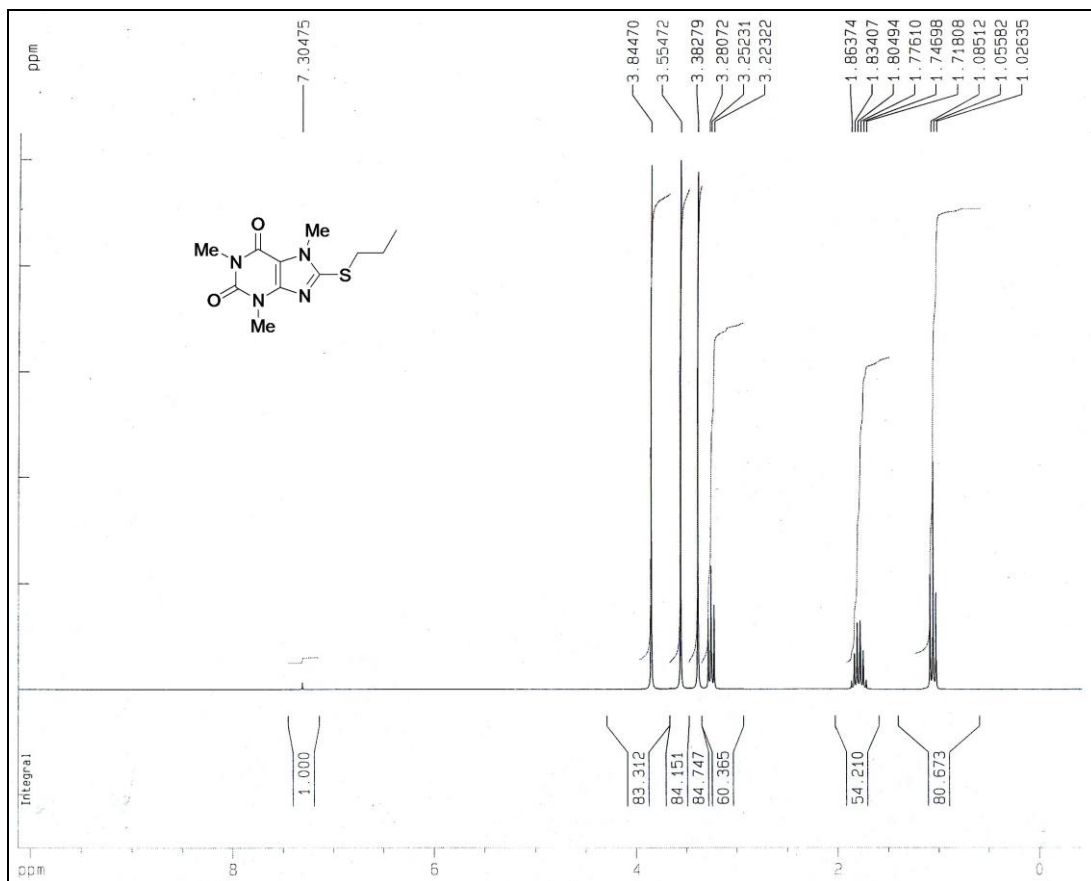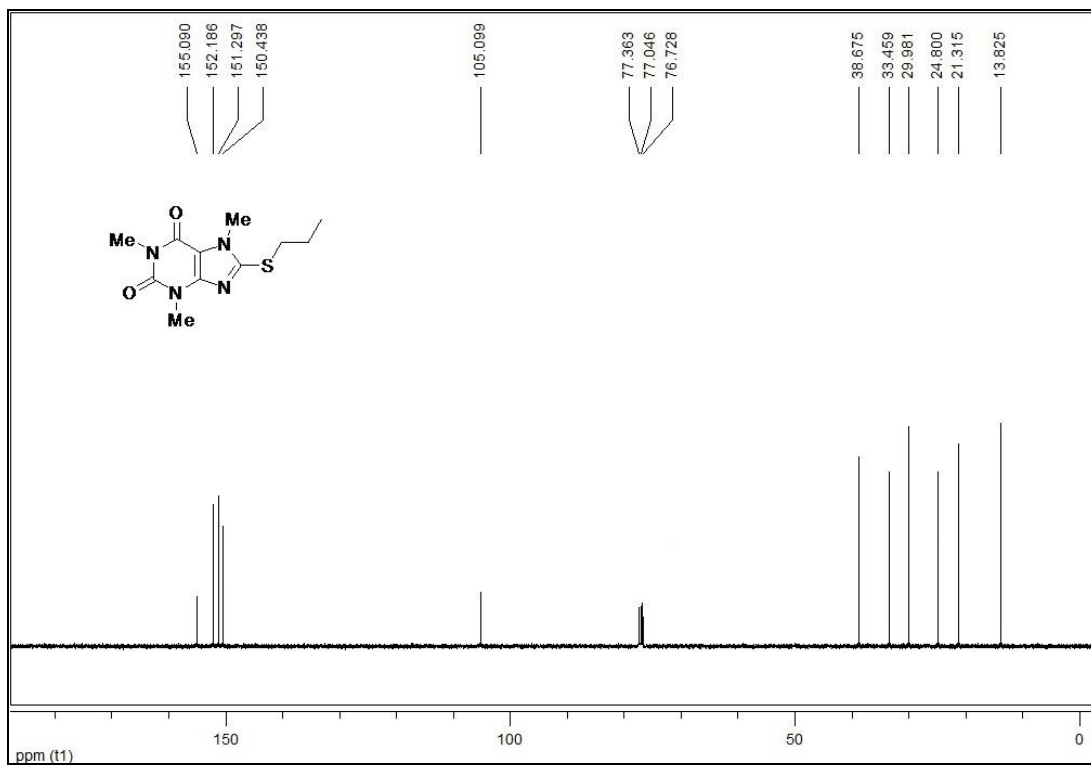

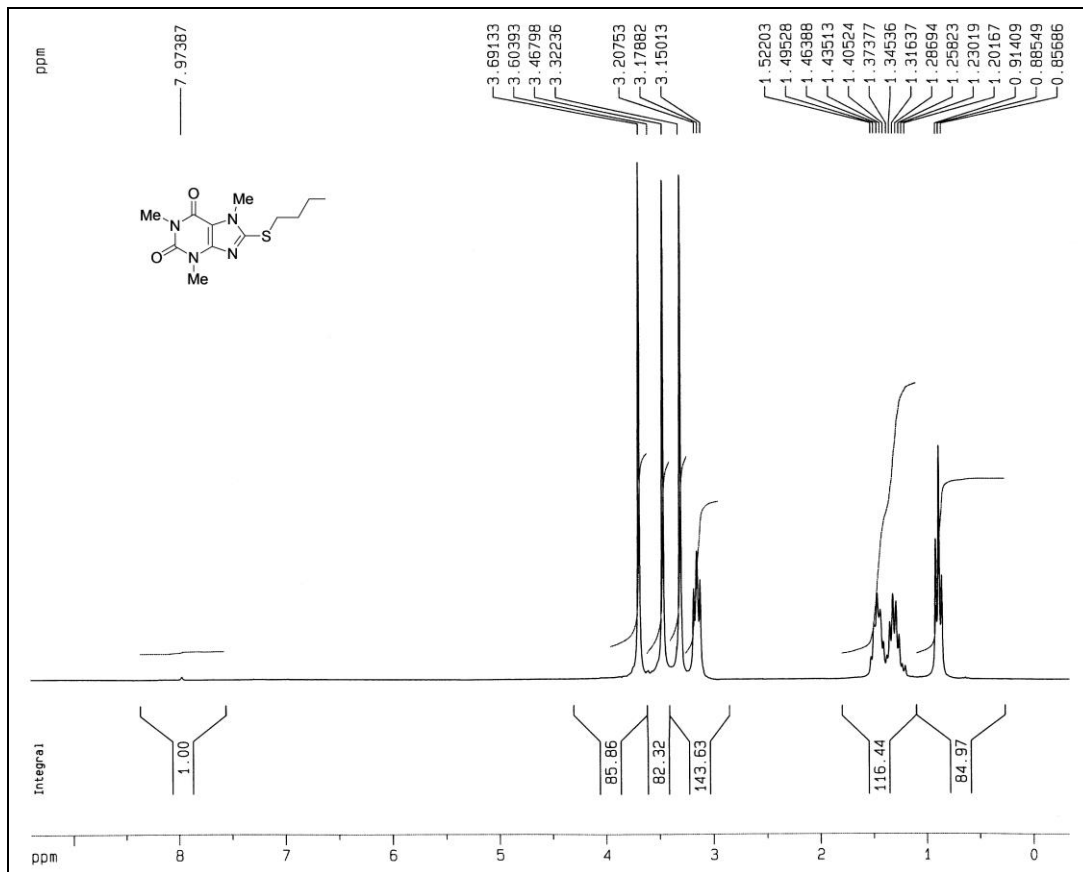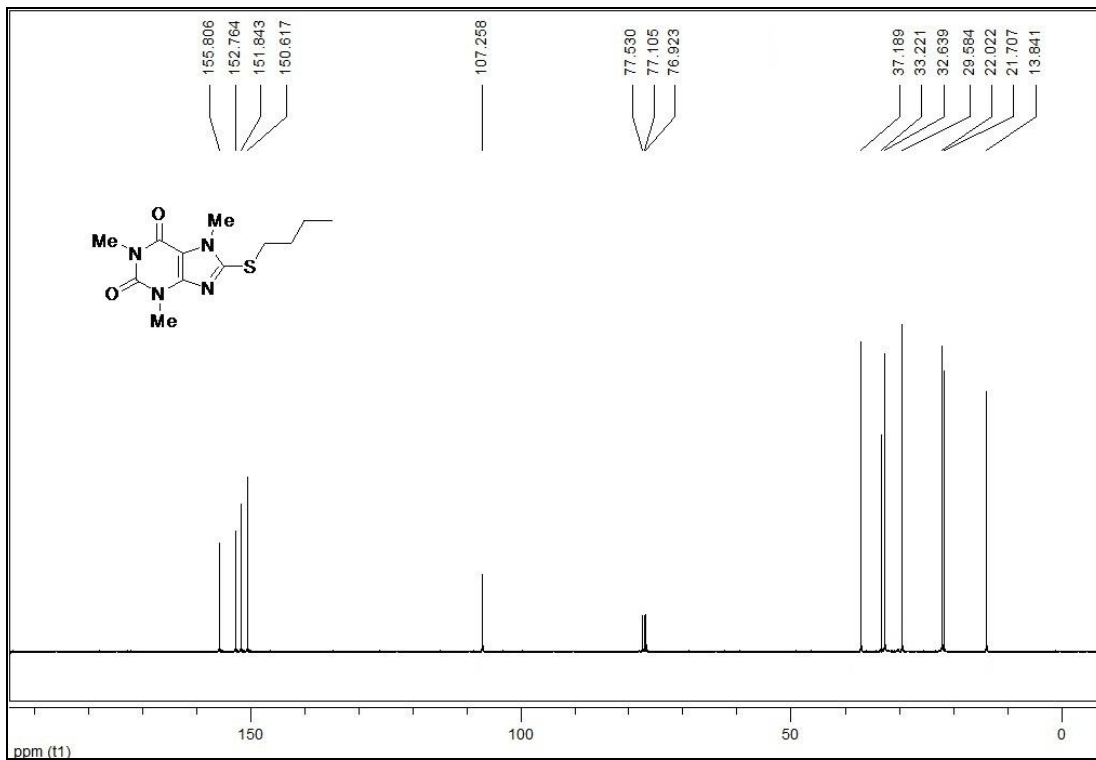

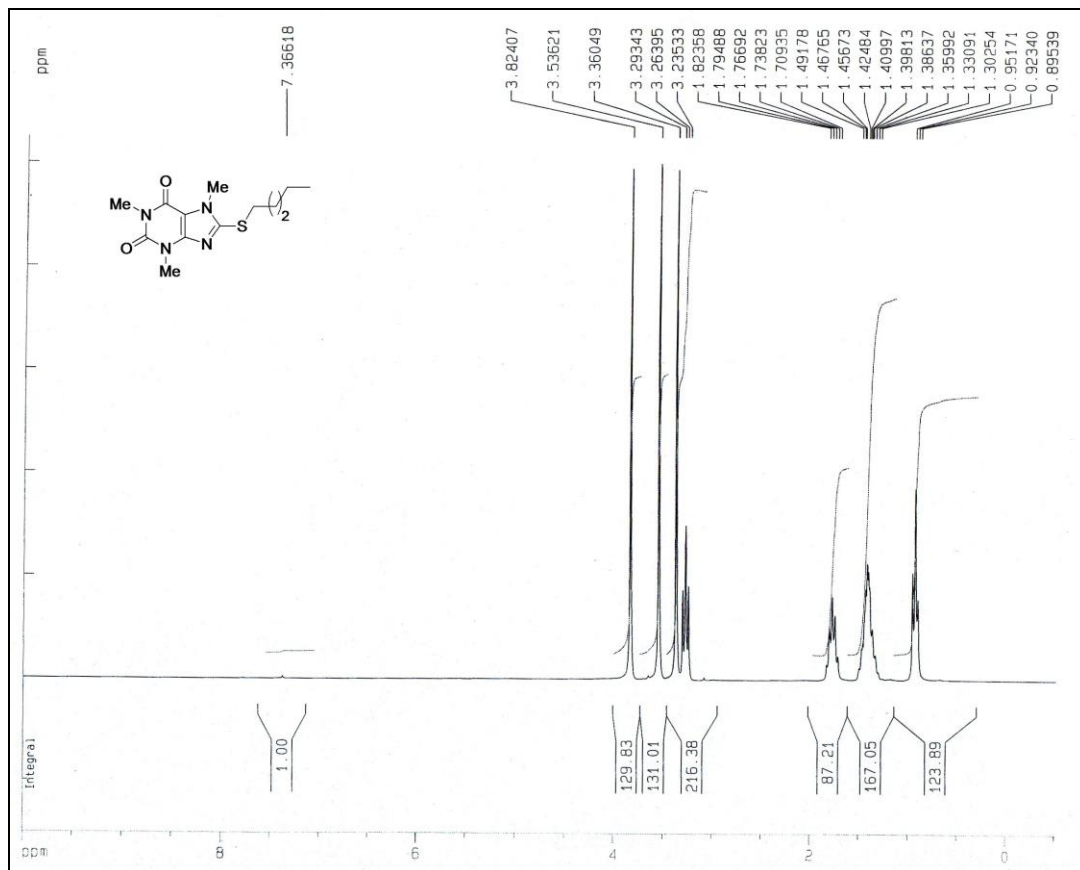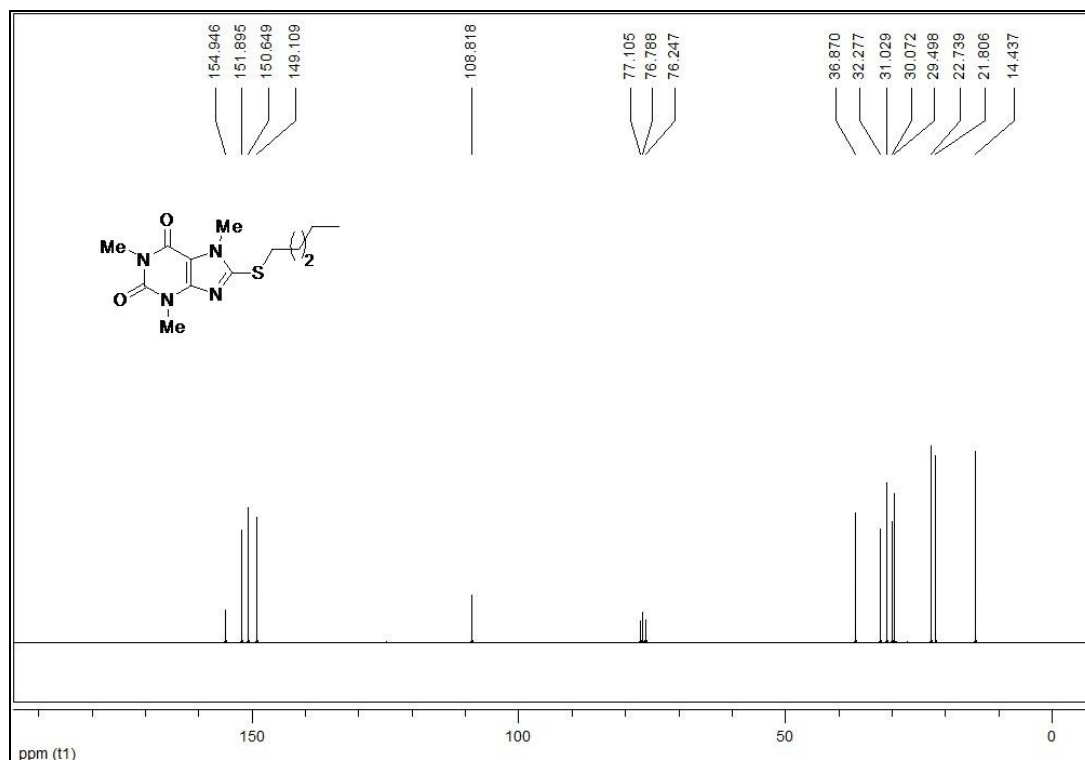

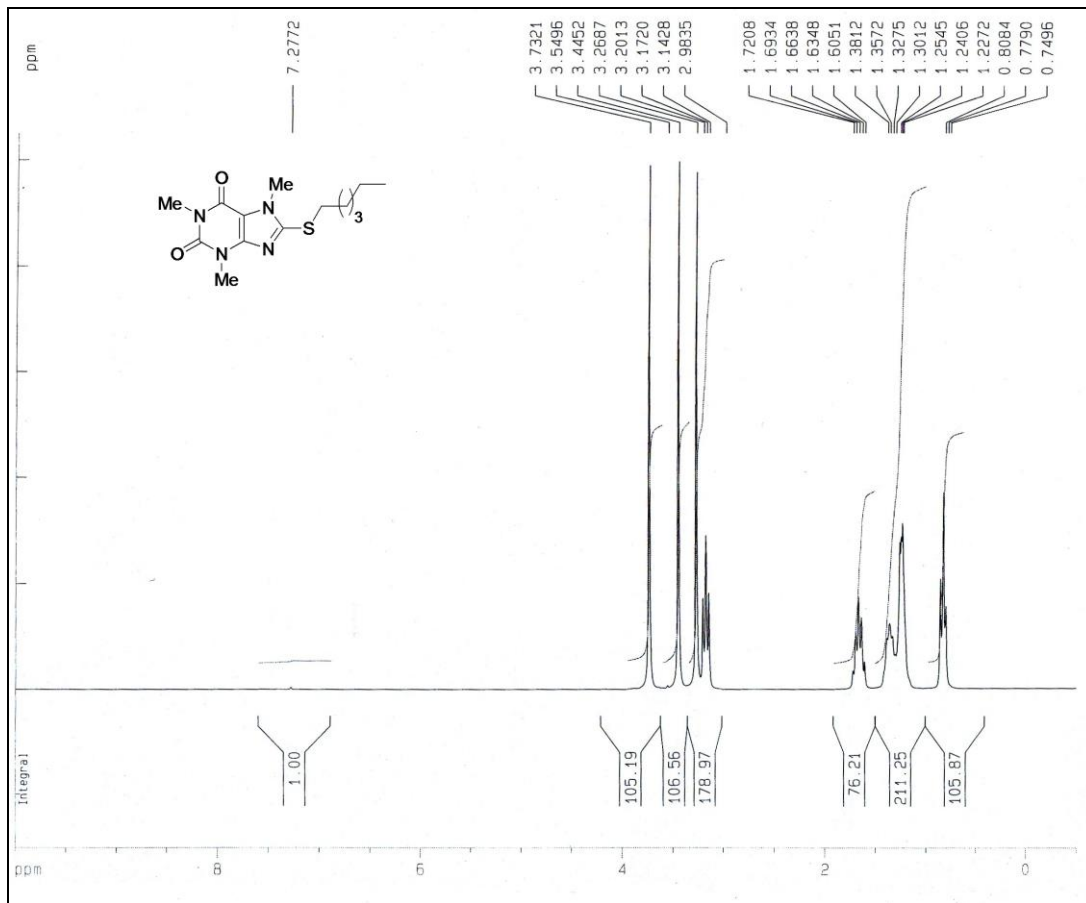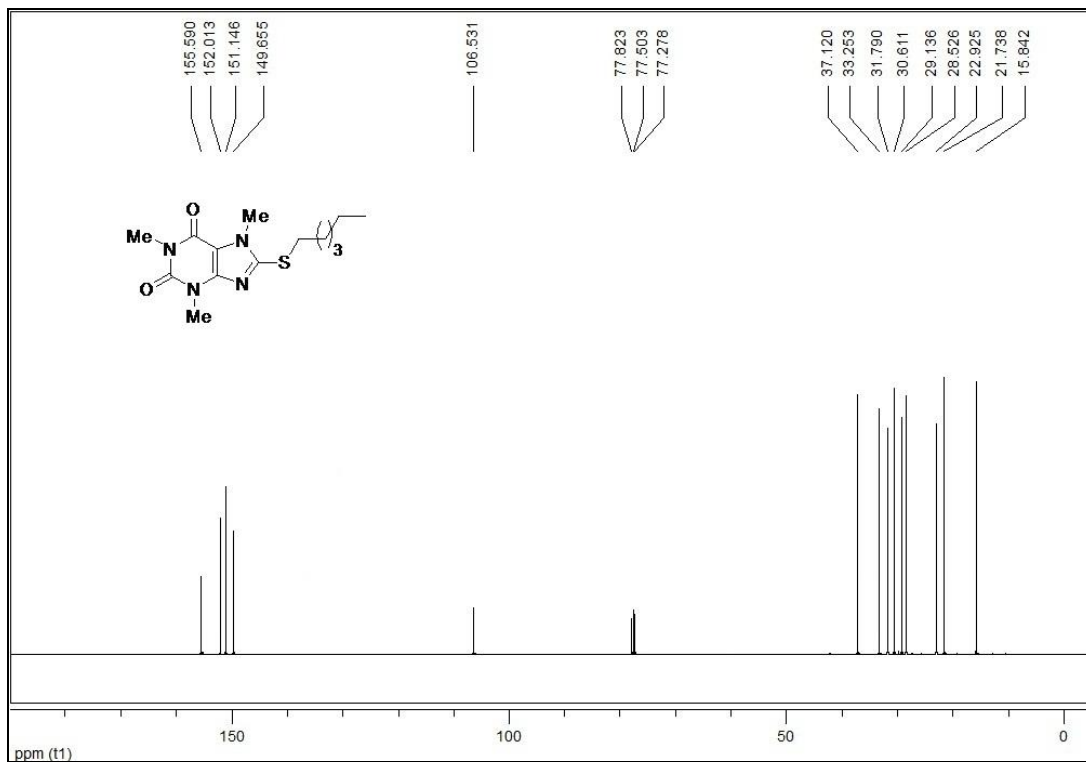

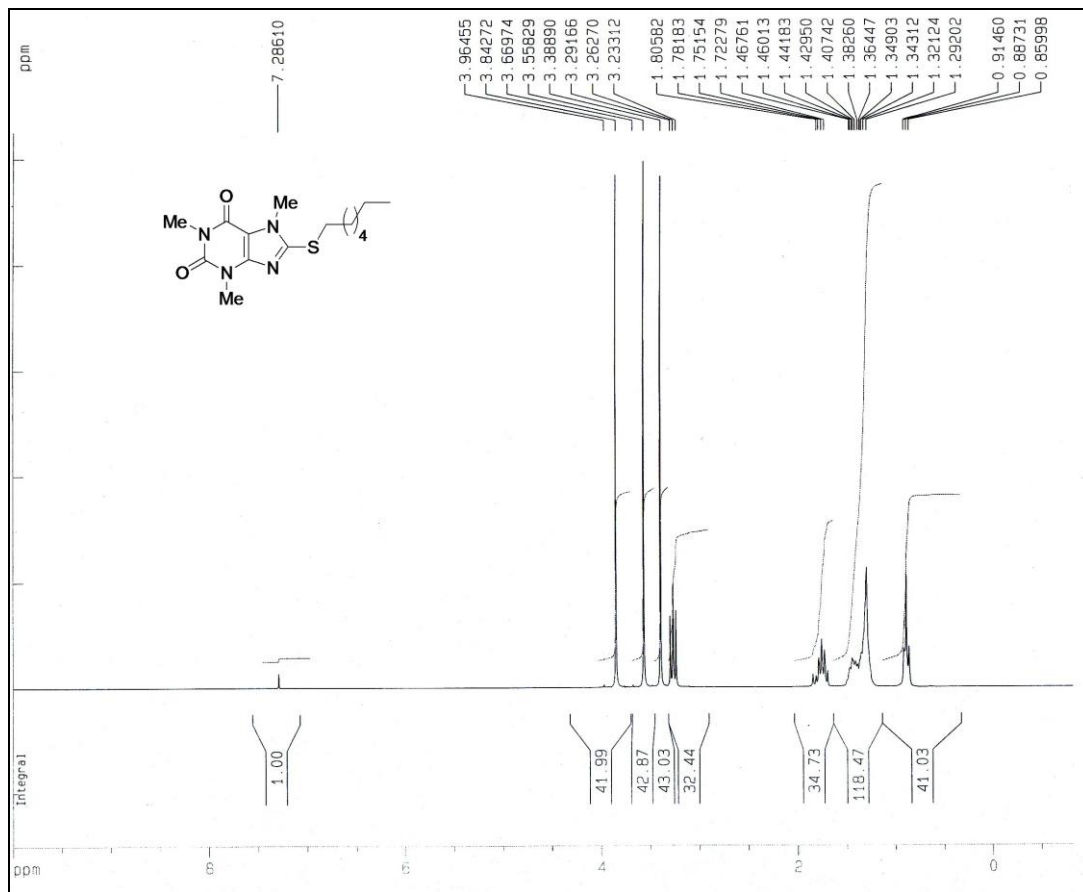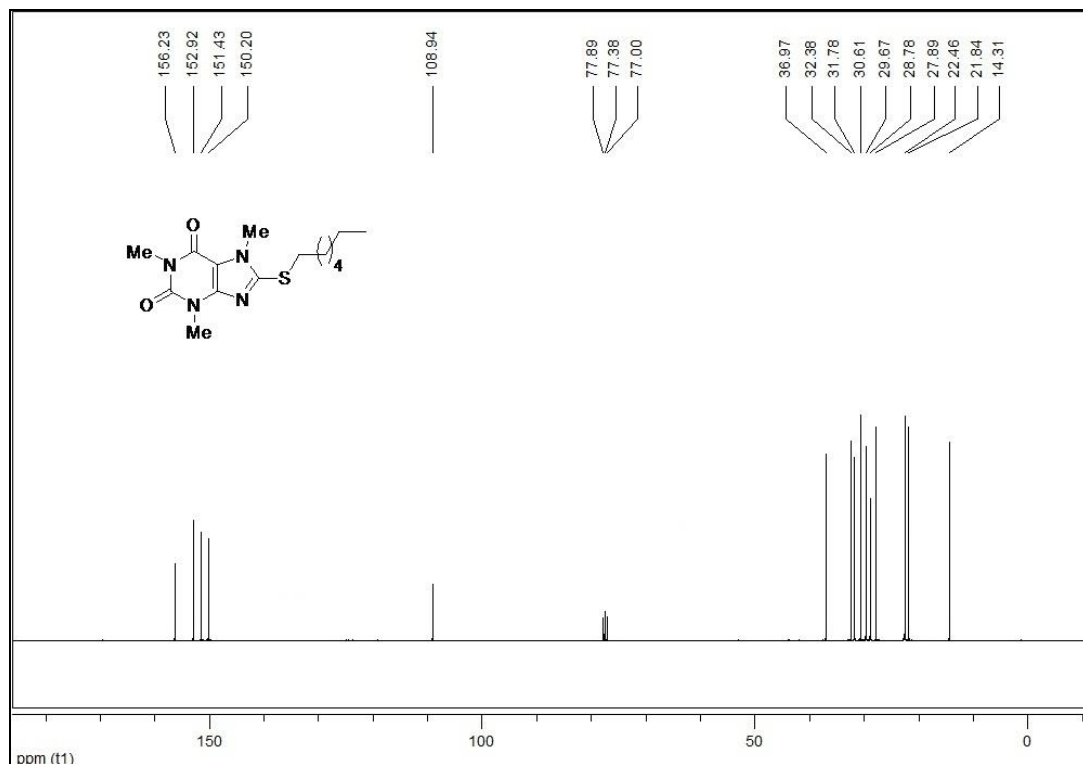

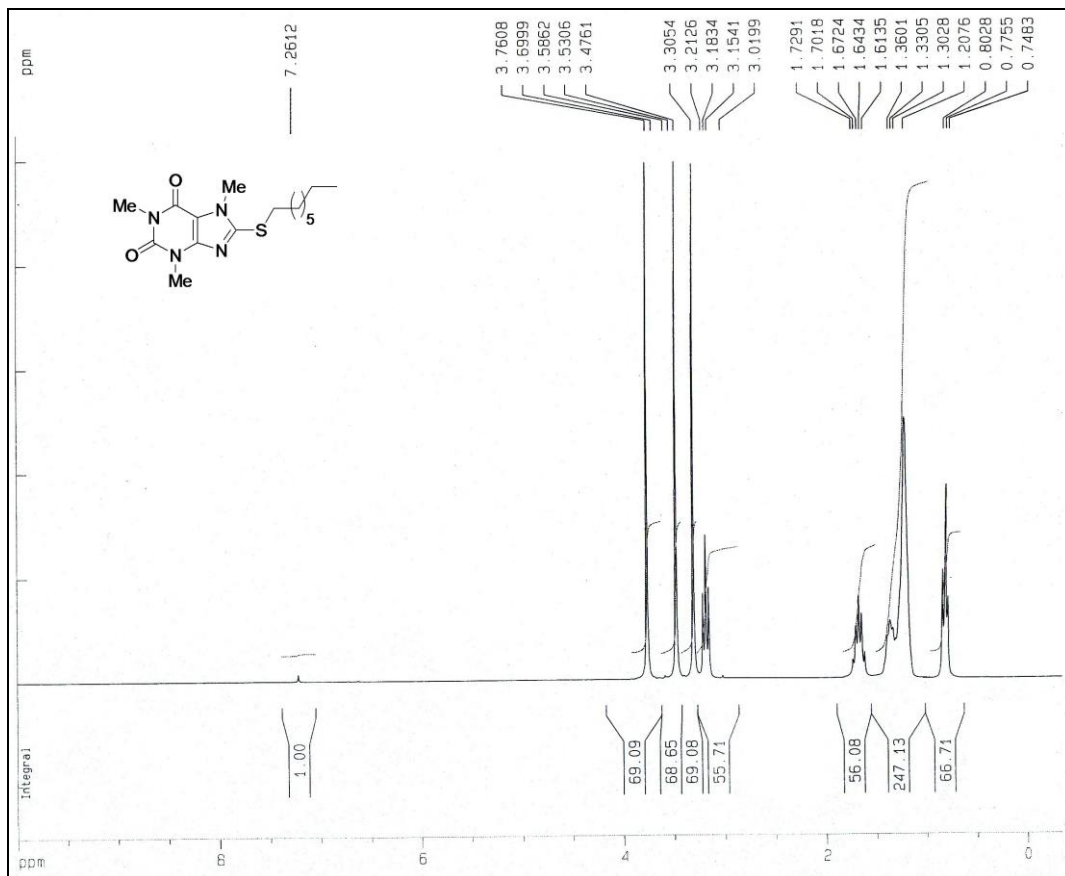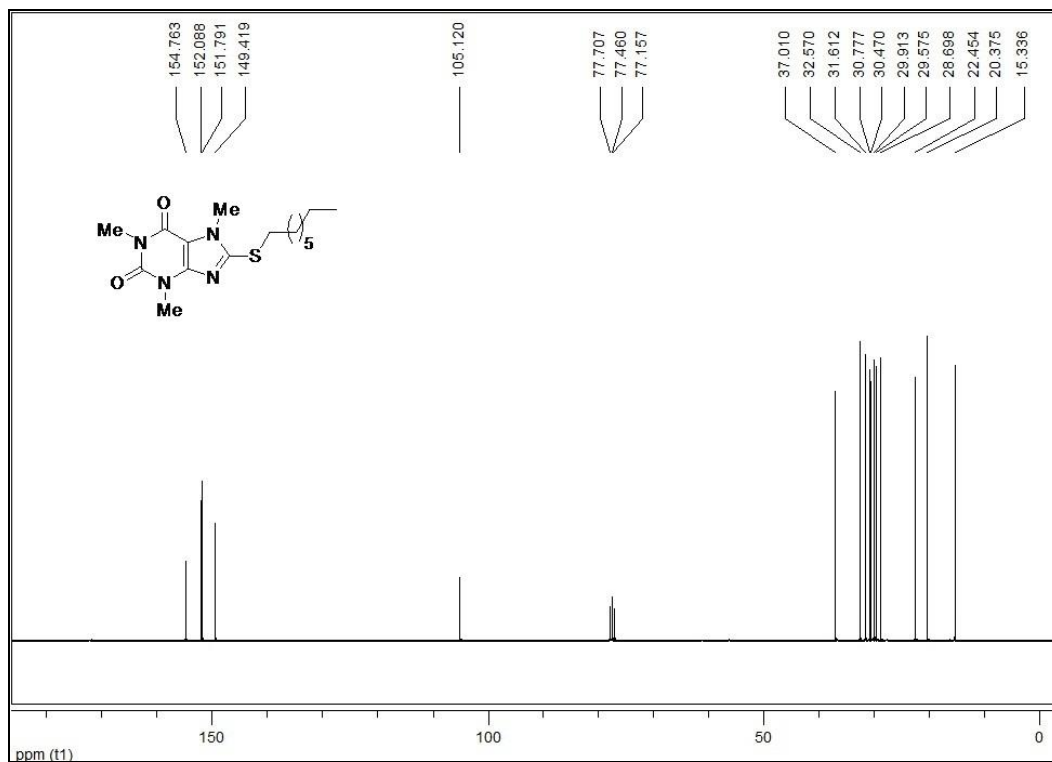



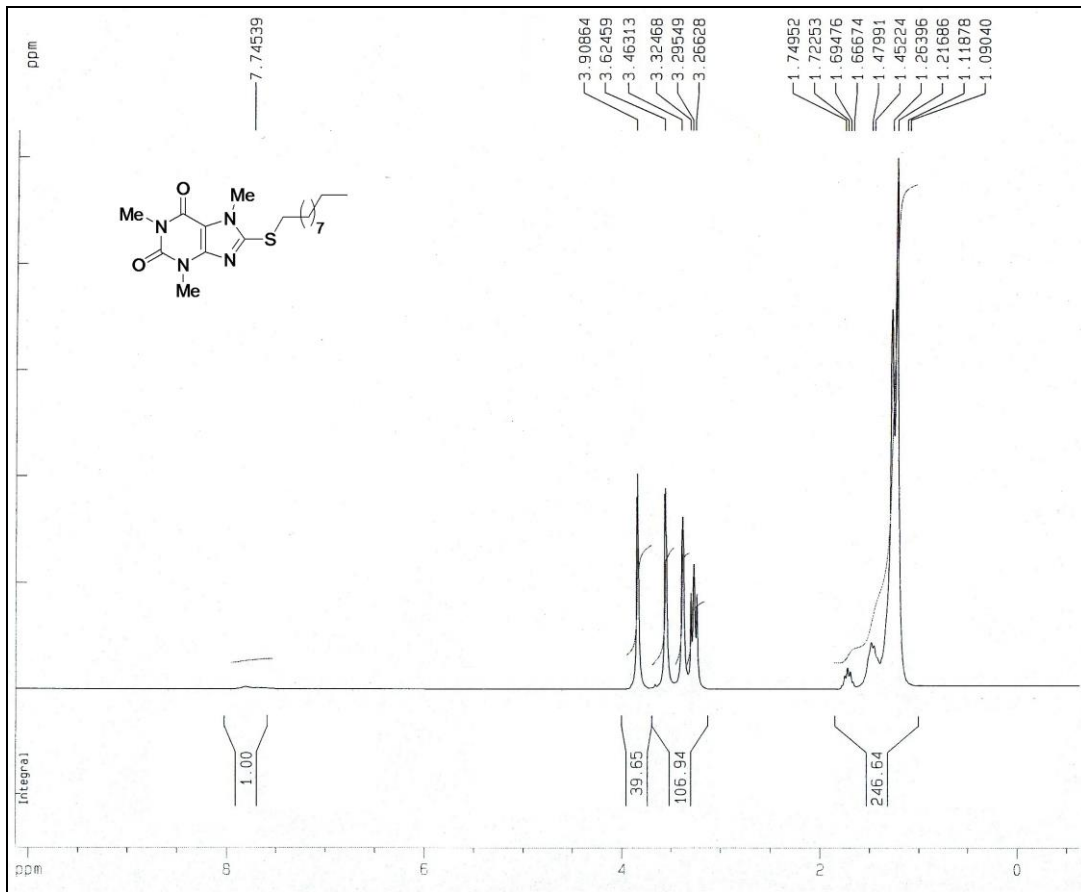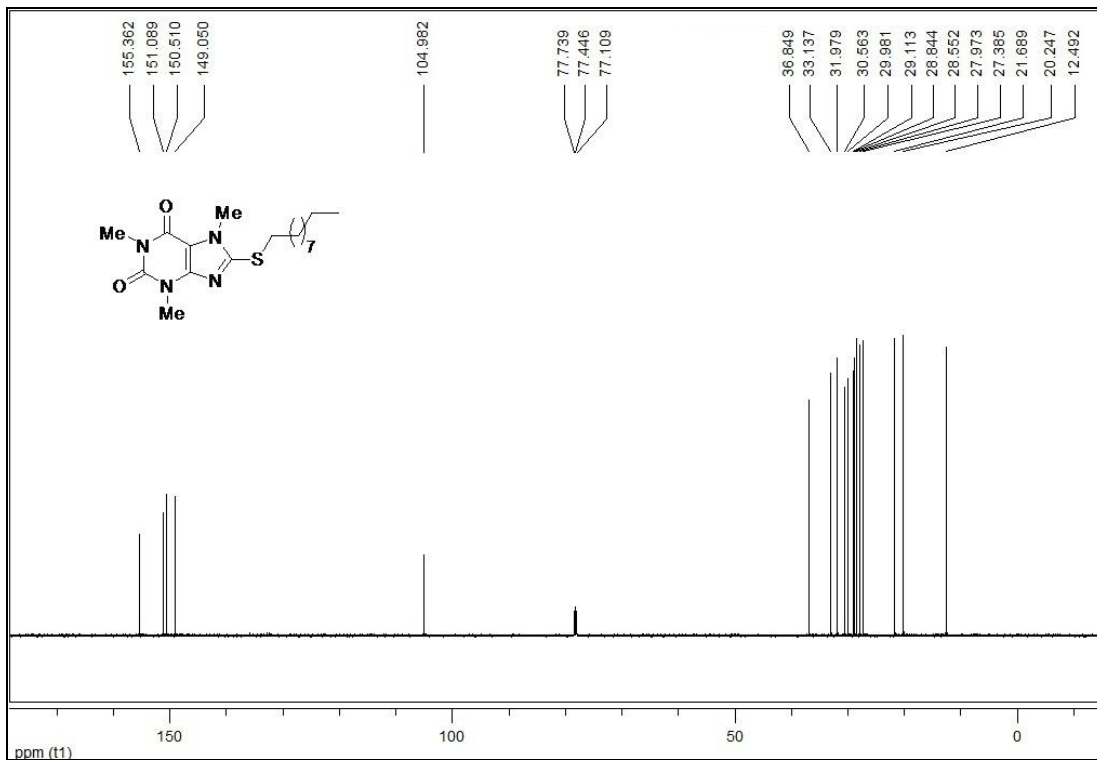

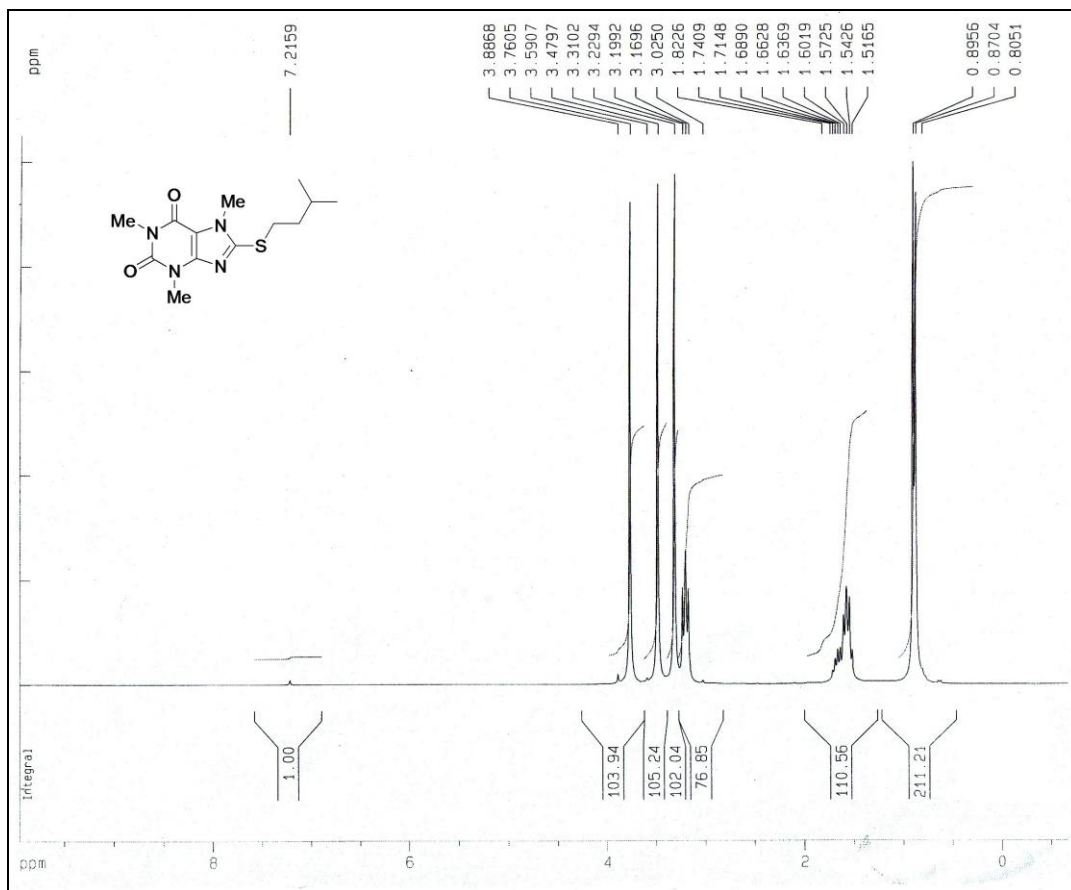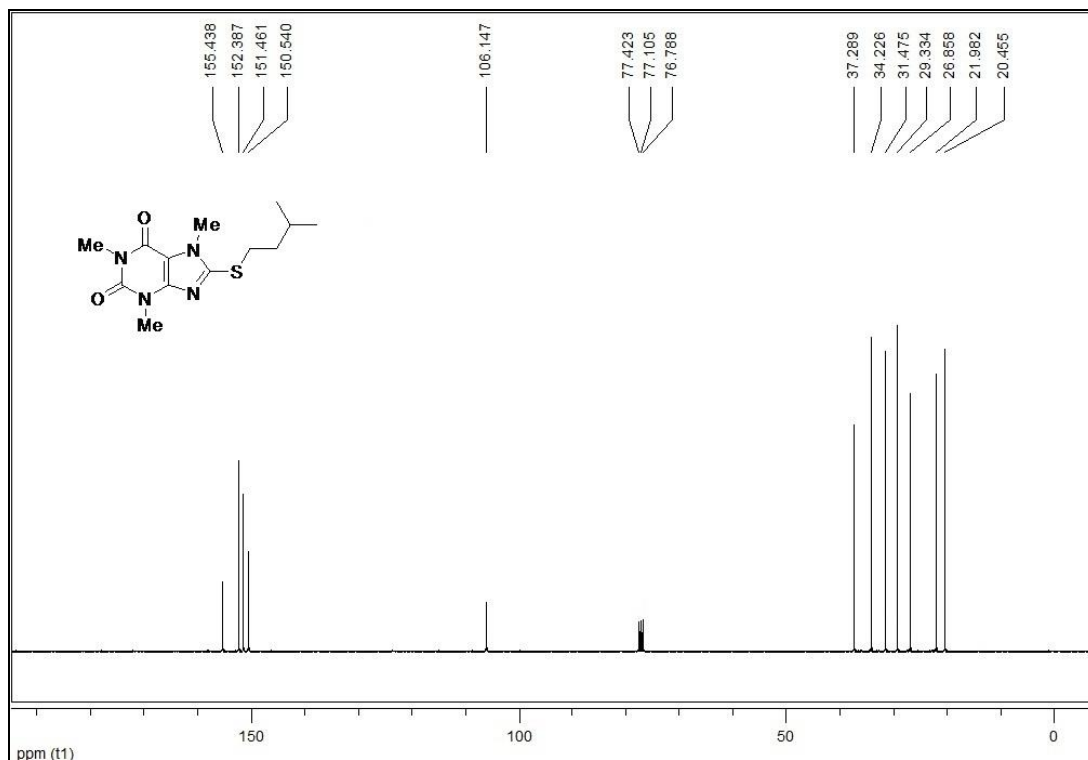

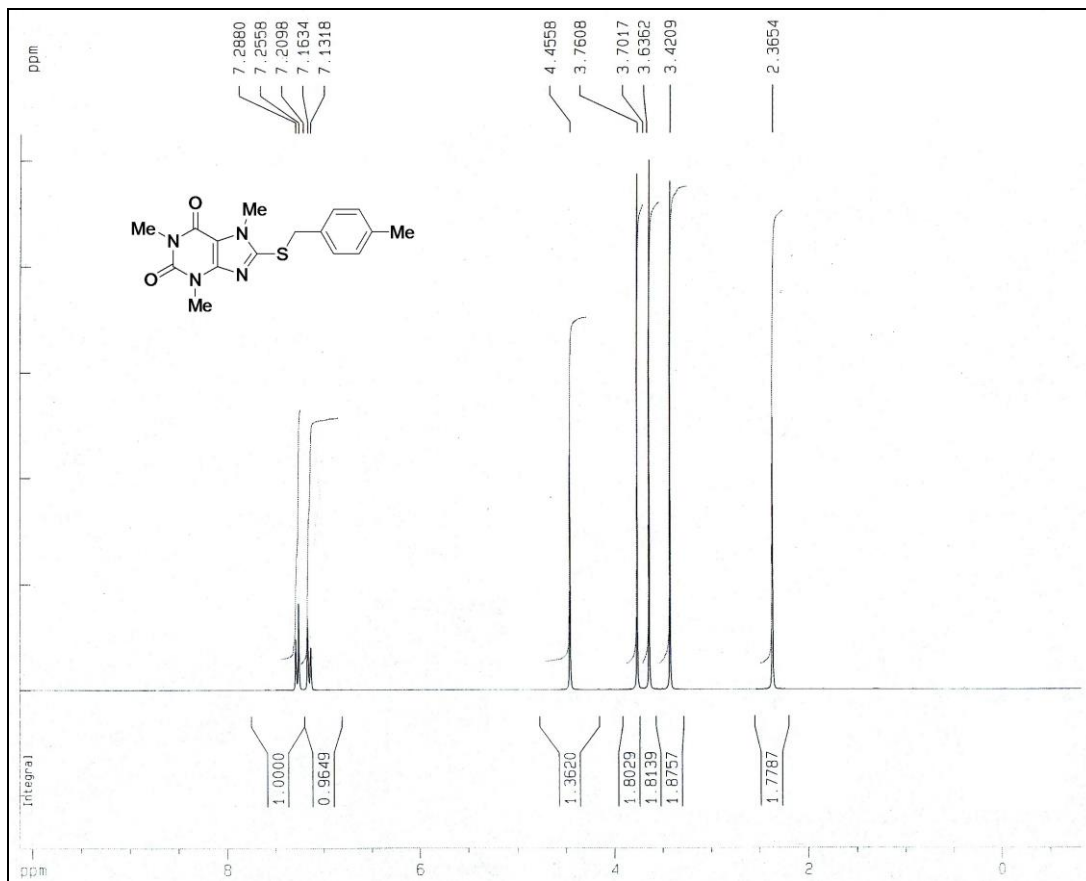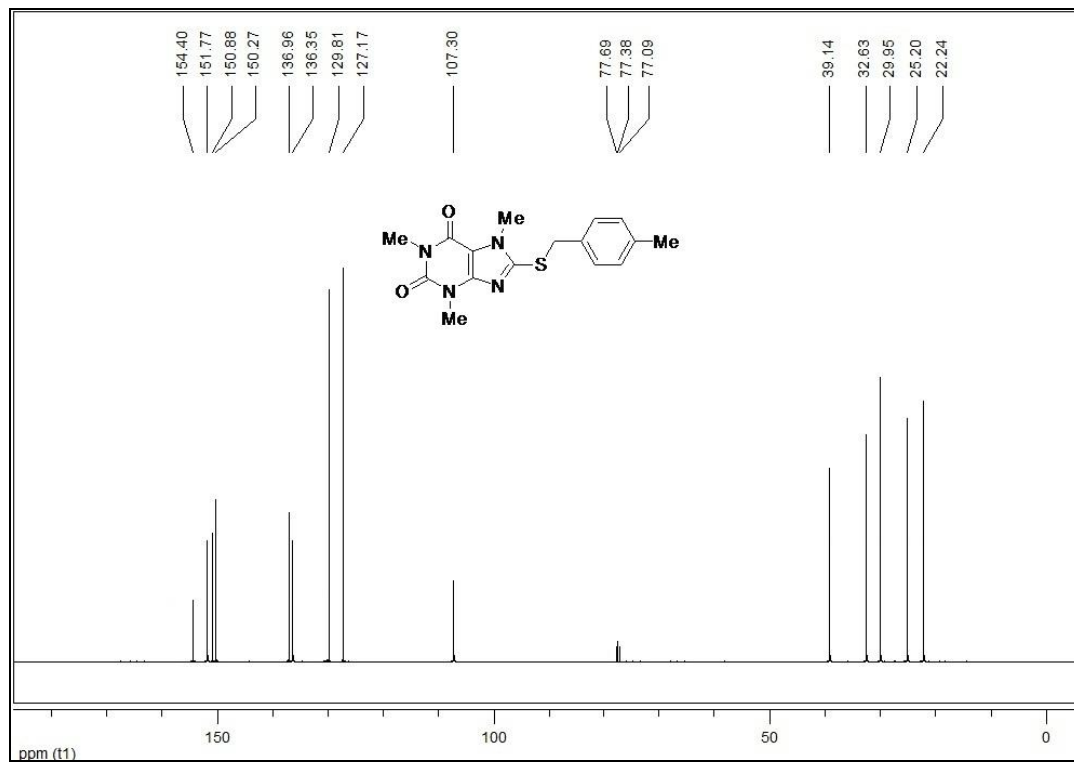

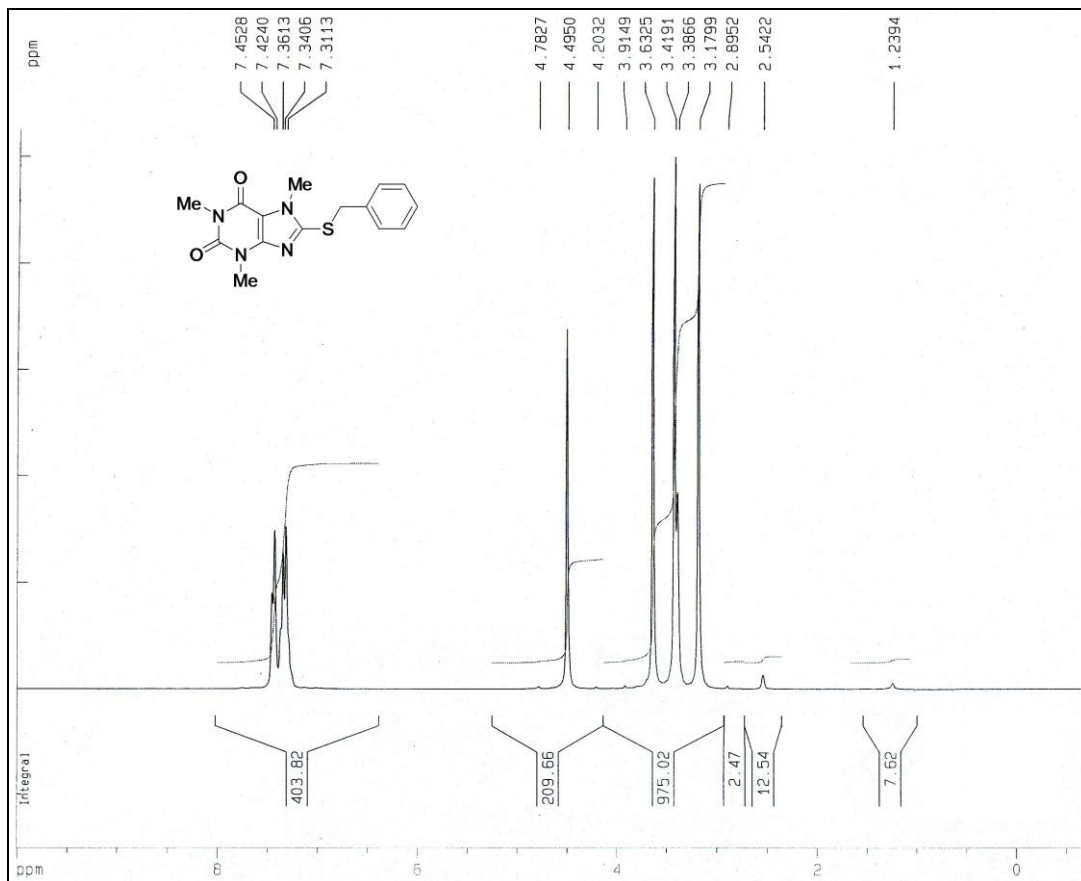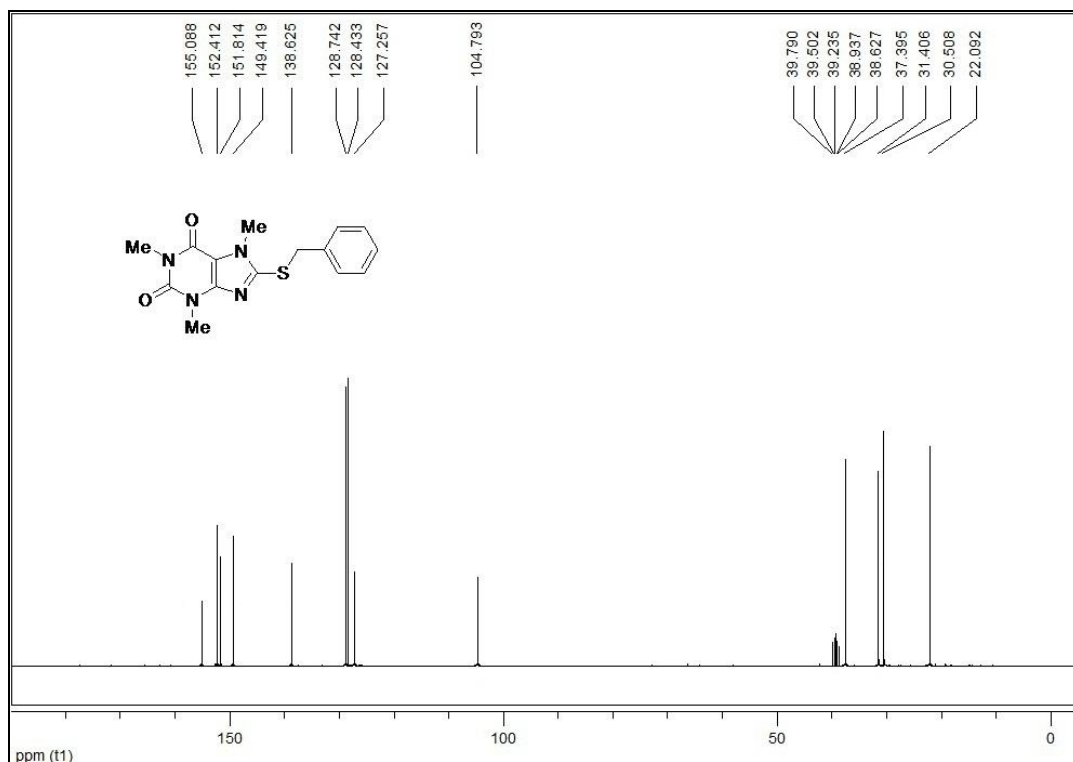

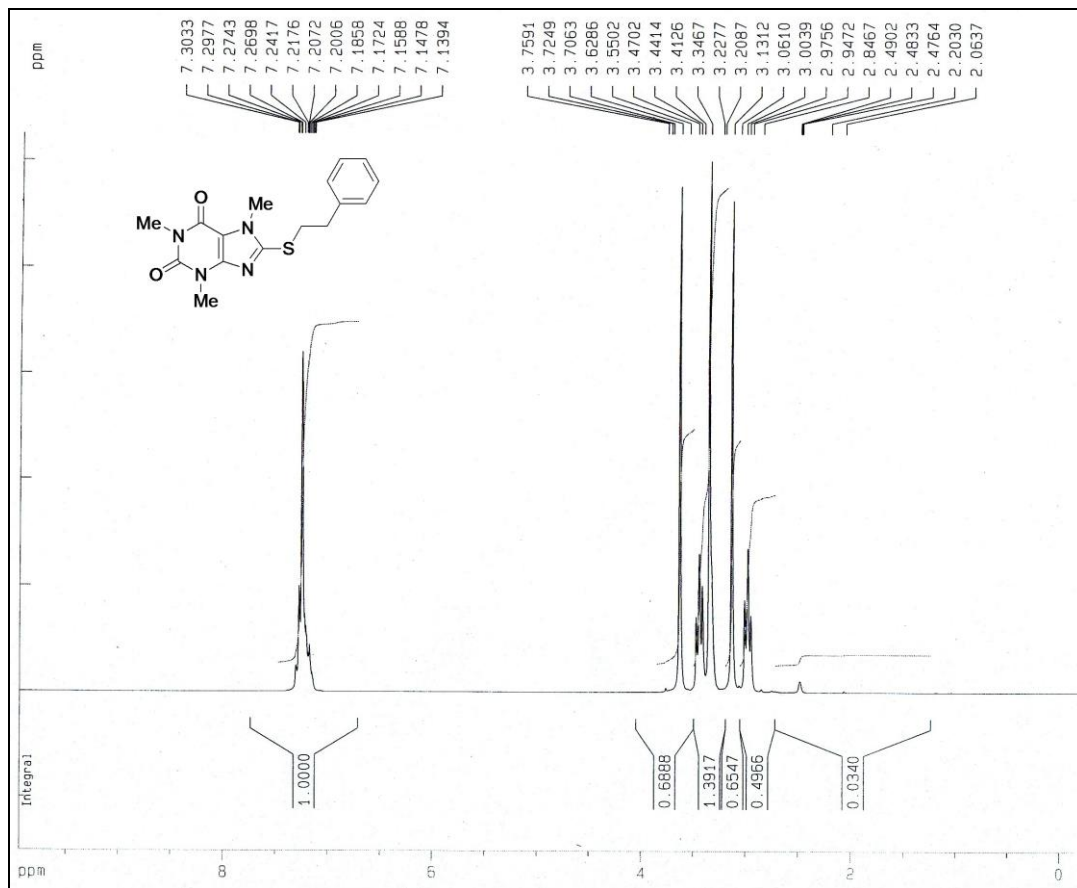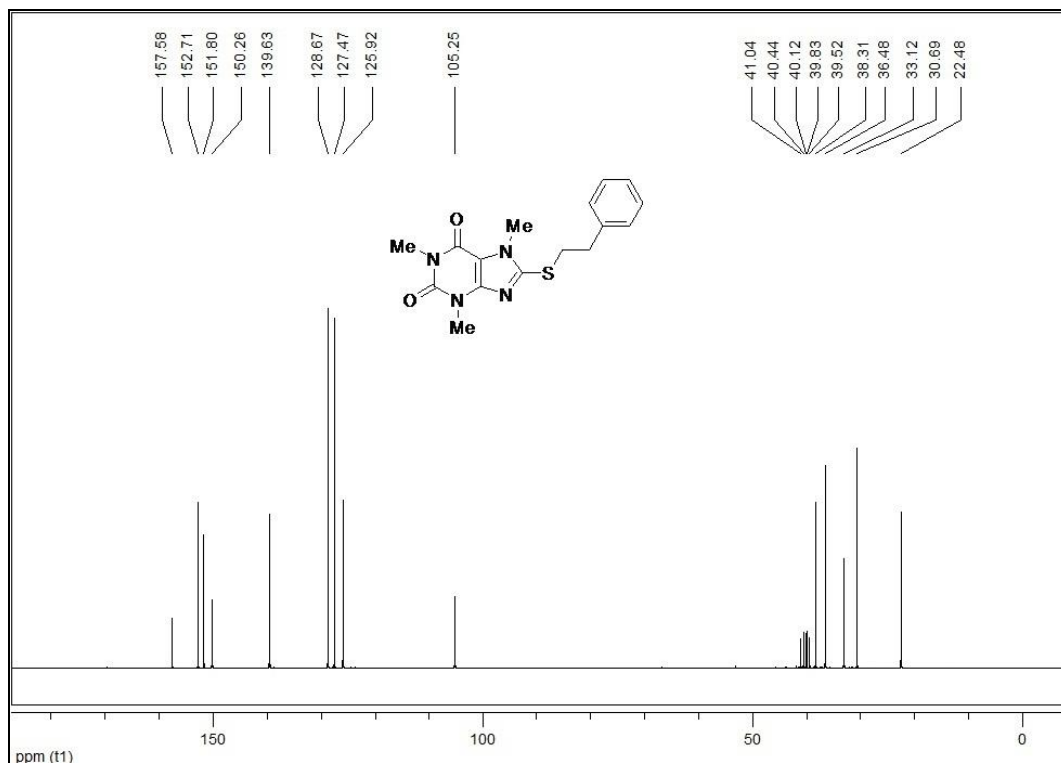

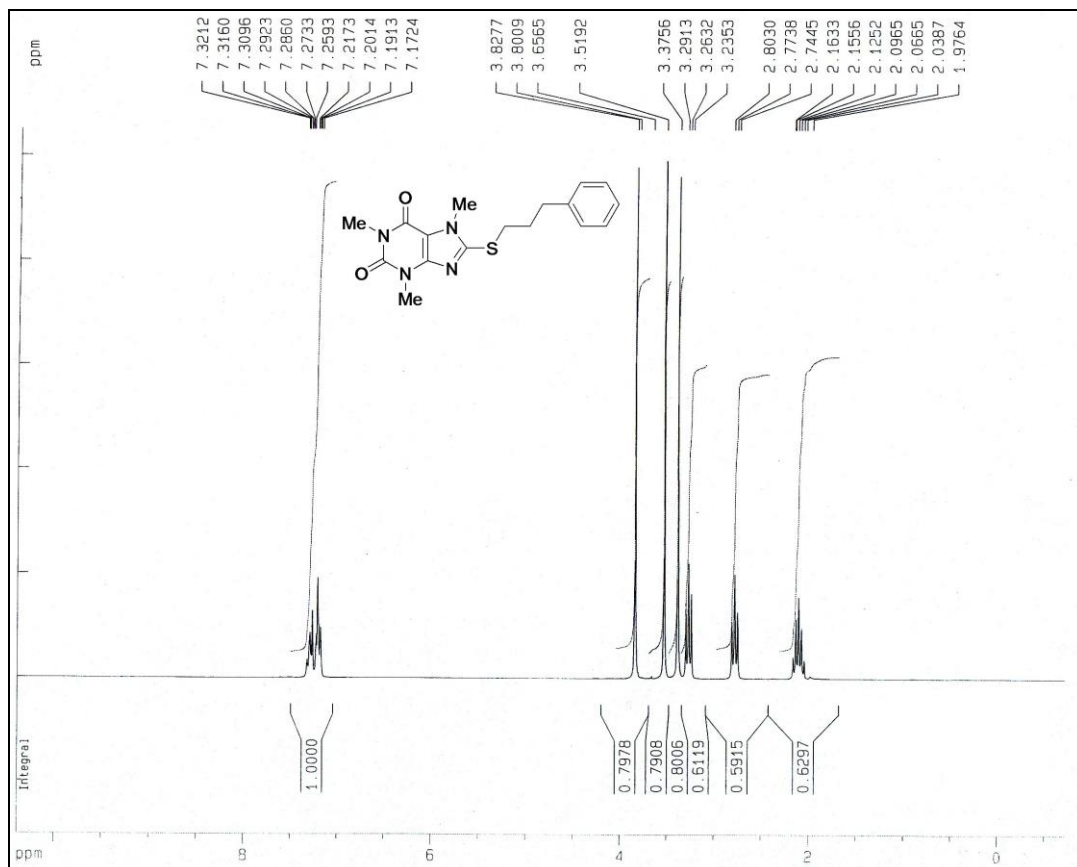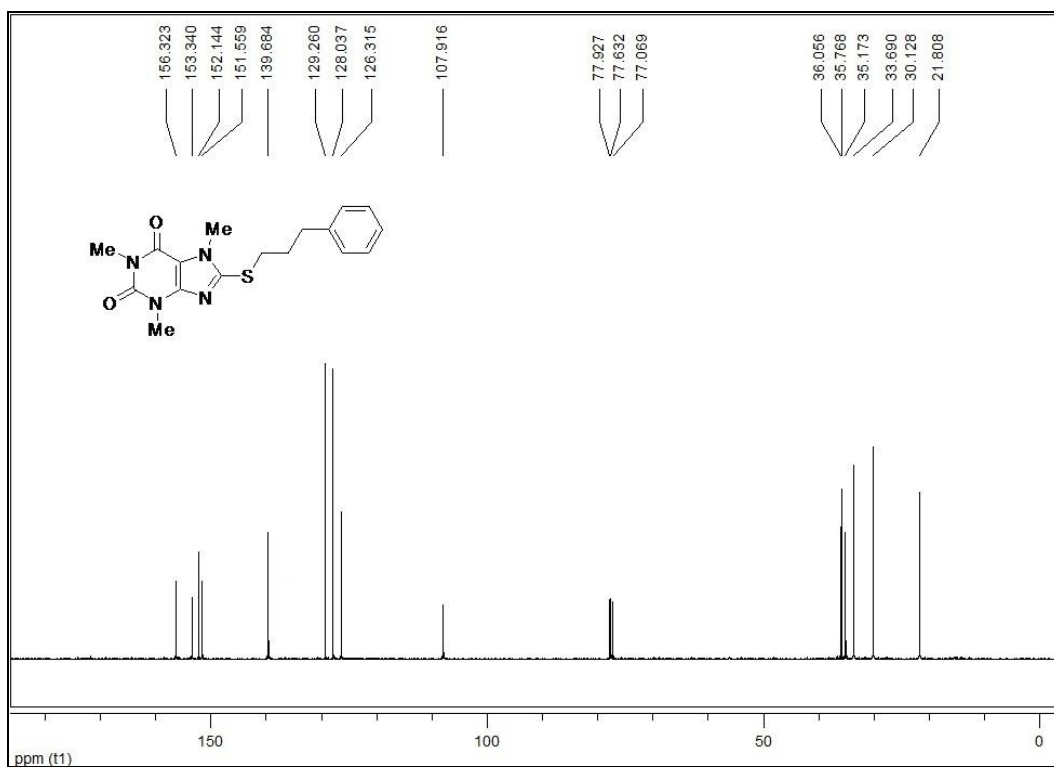

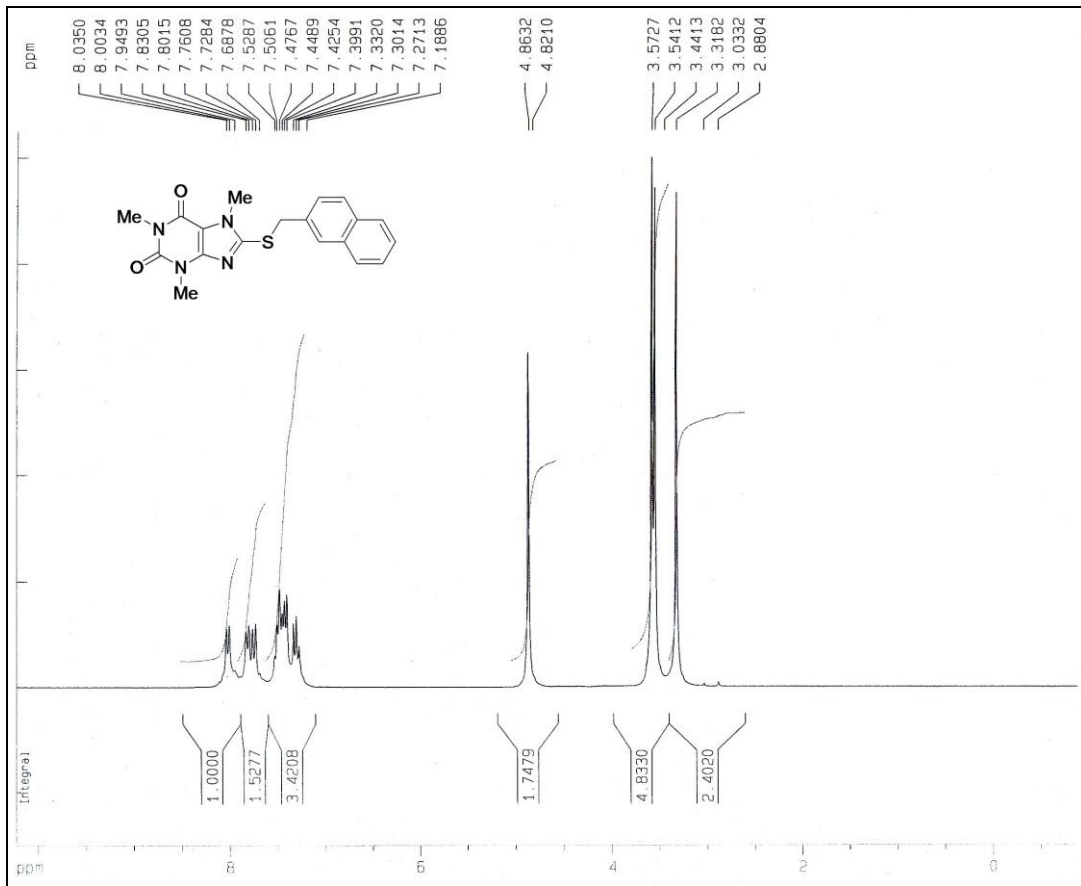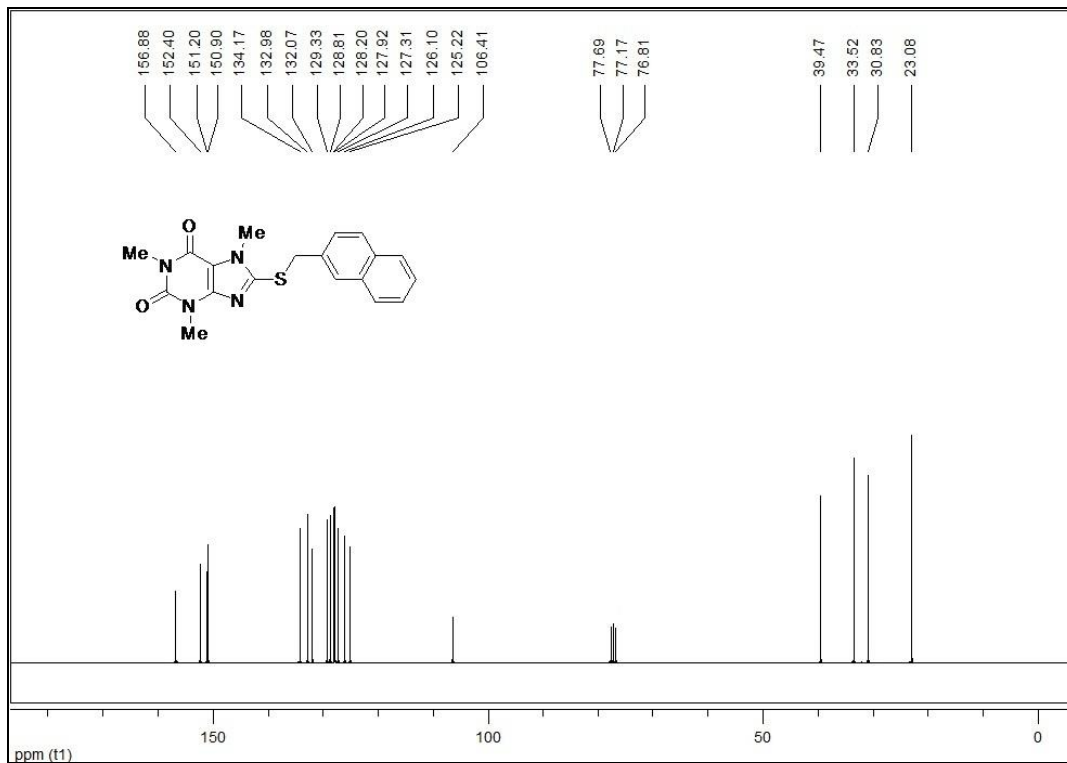

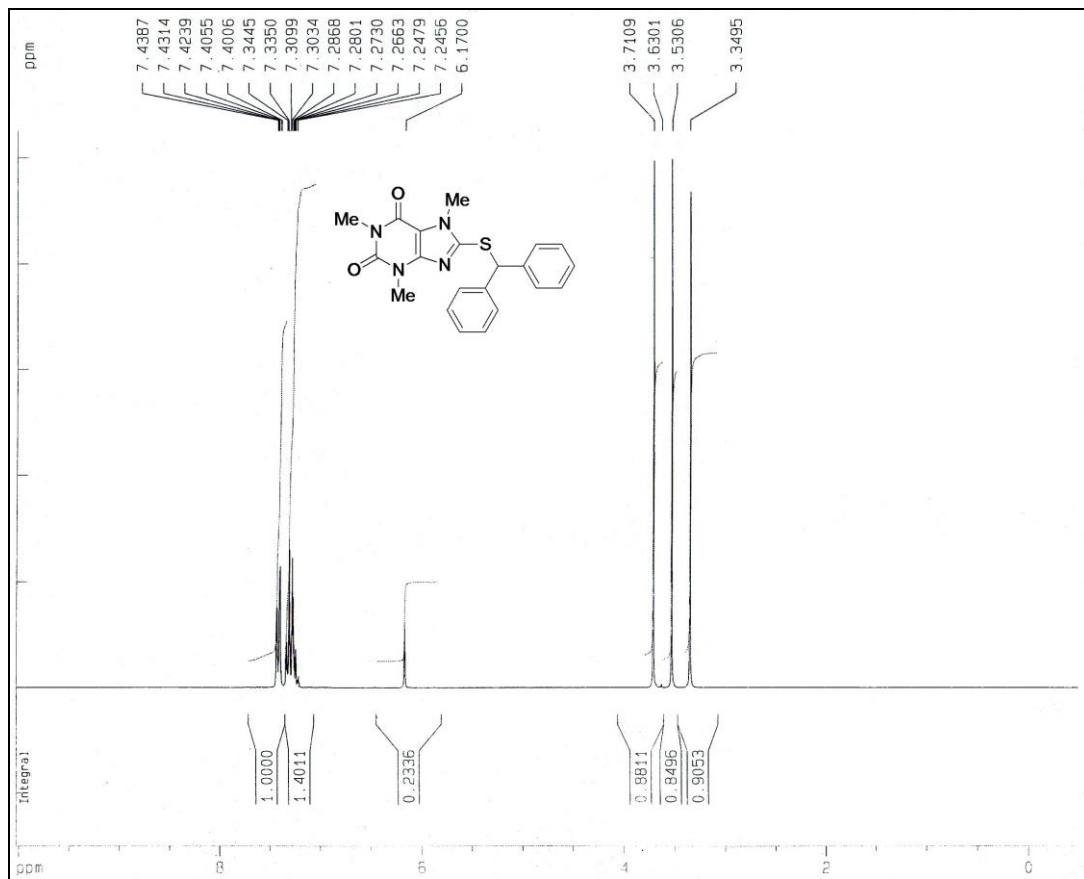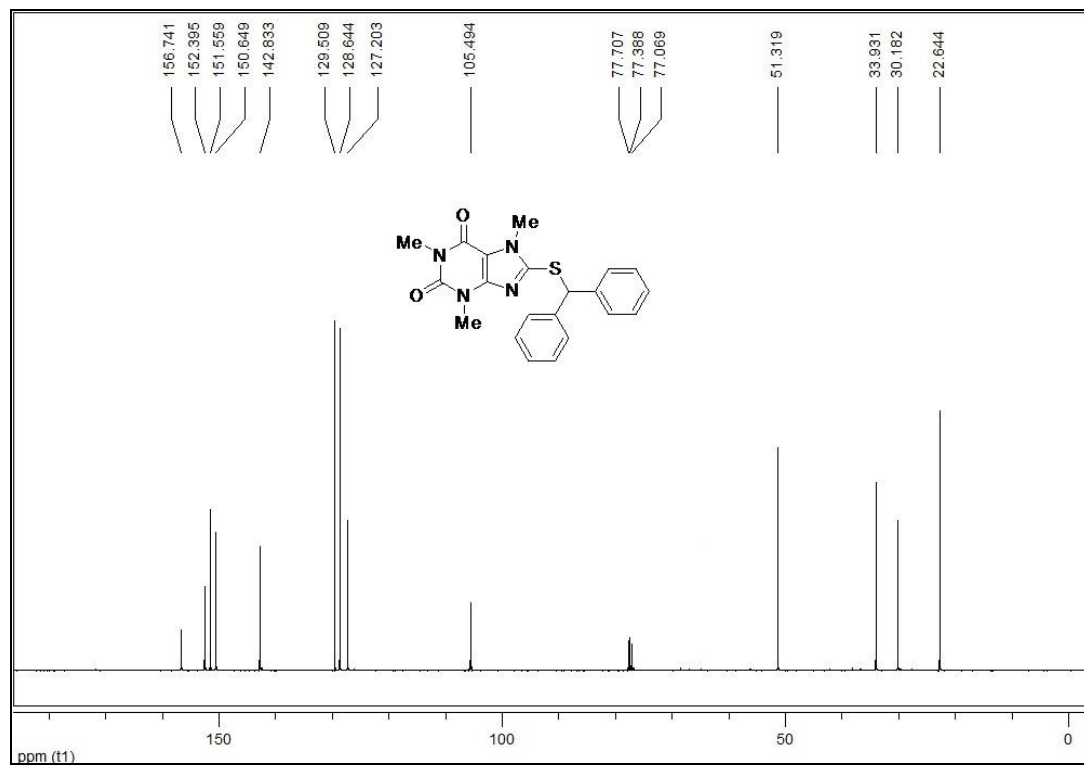



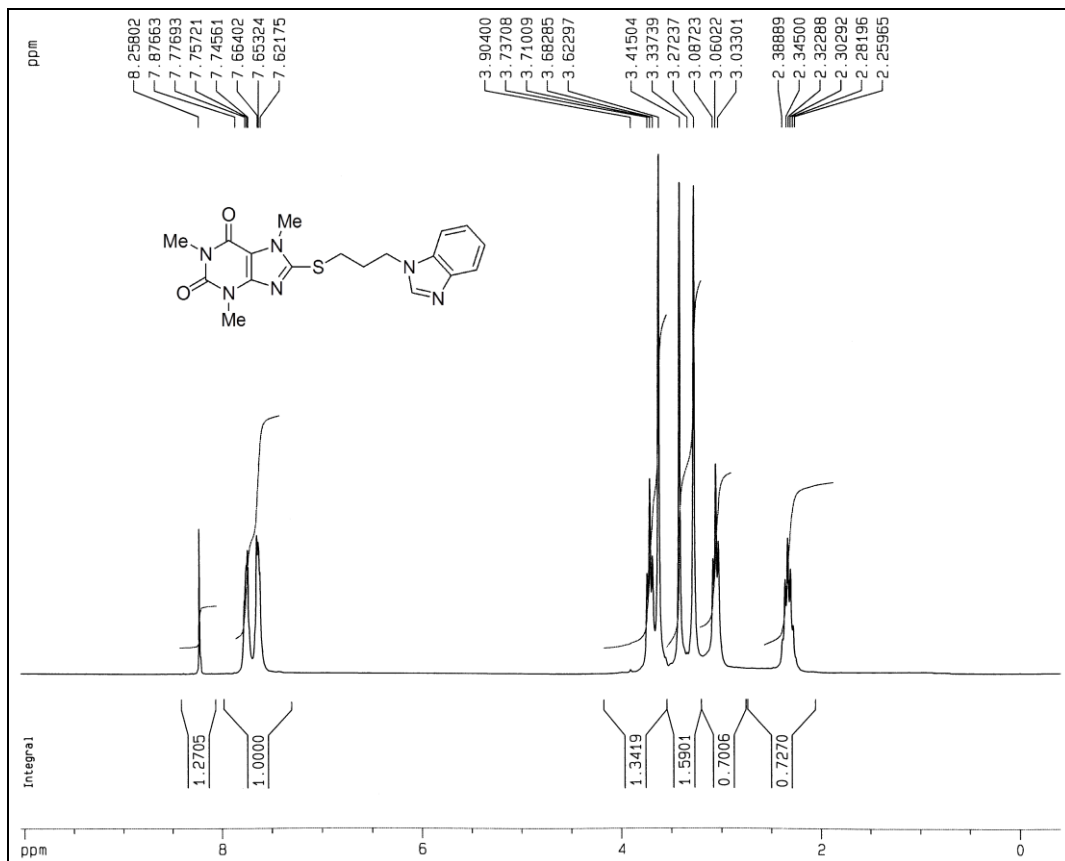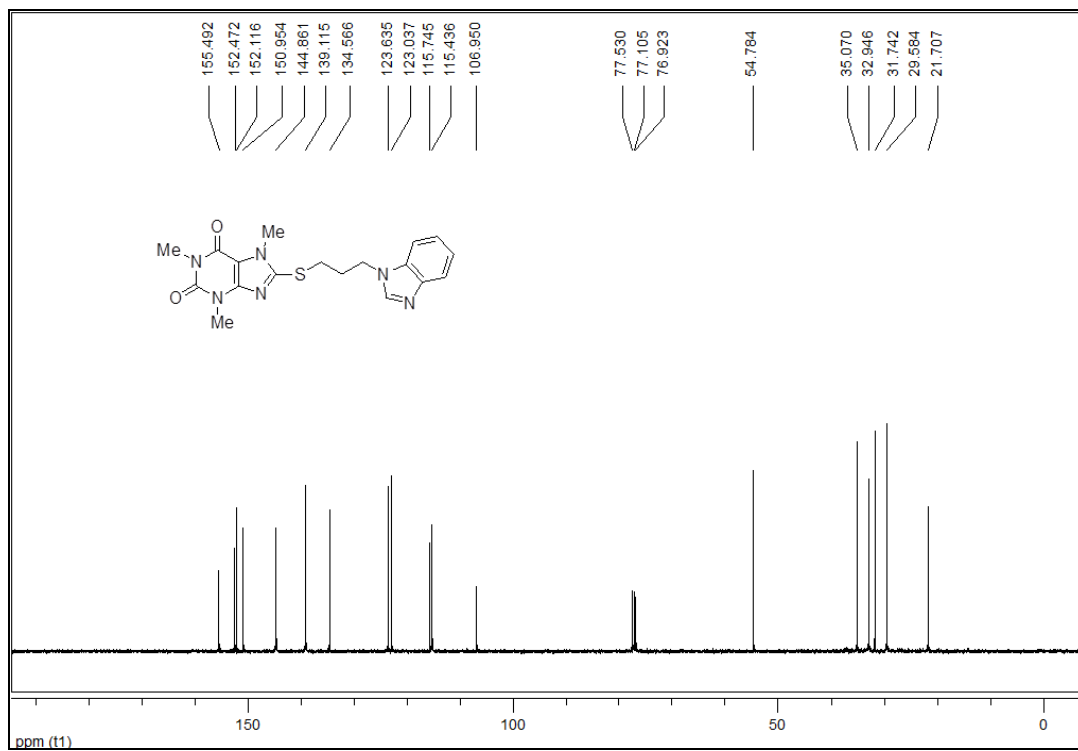

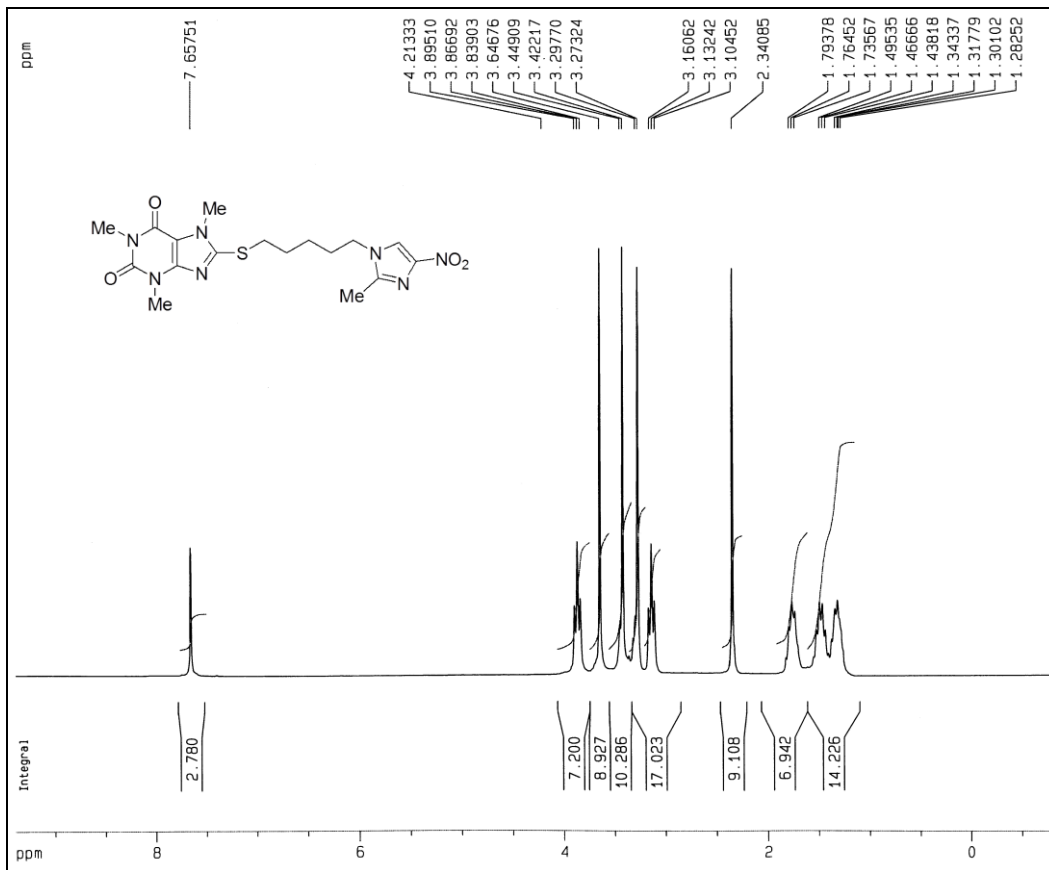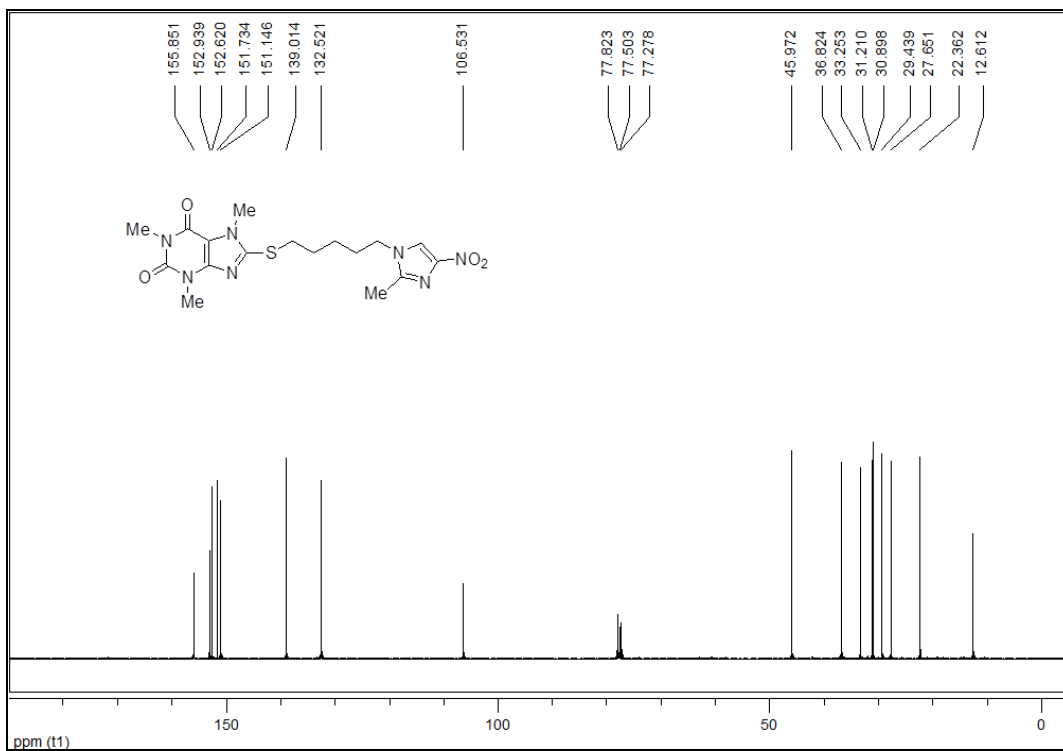

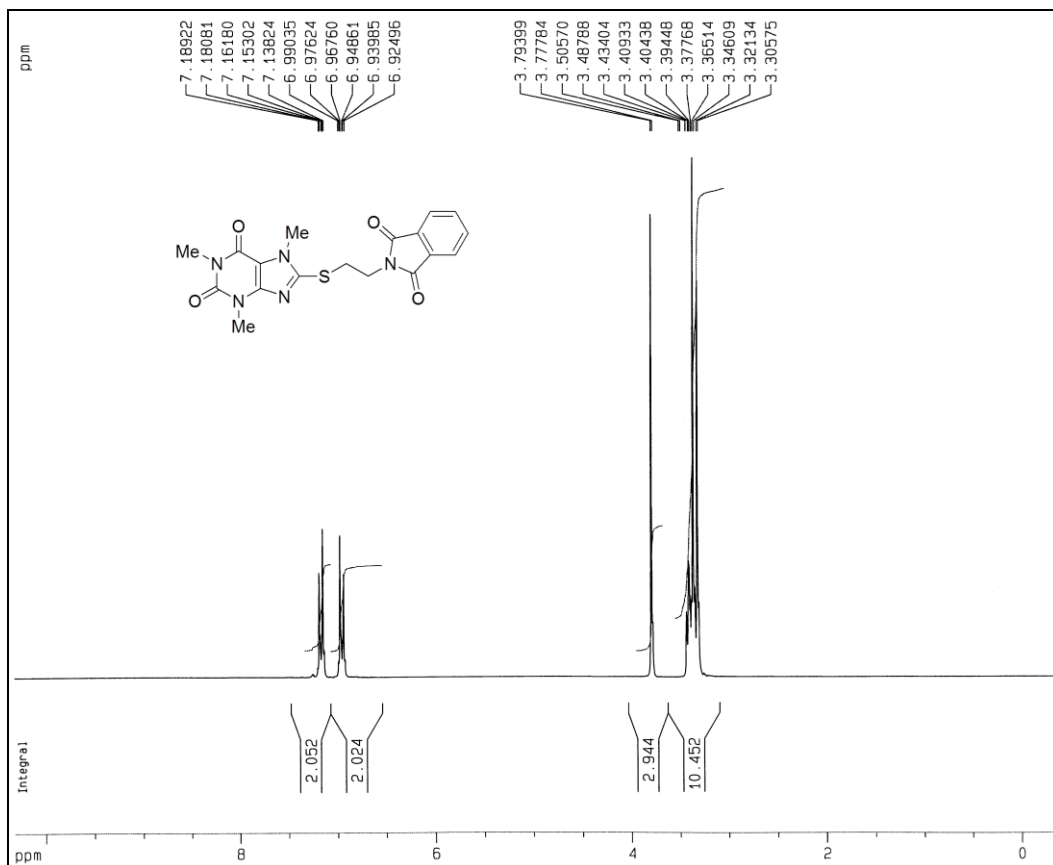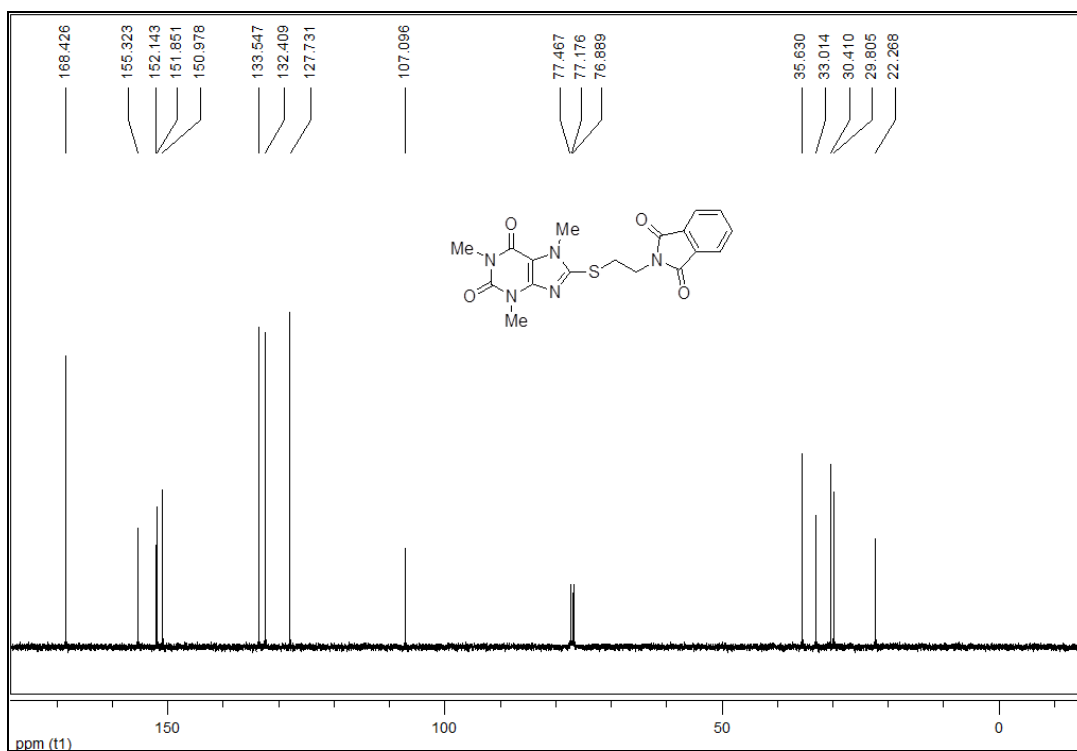

Supplement: c6ra17814f1.pdf [file c6ra17814f1.pdf]
